# Supplementary material
Source: PubMed Central journal article supplement (PMC2259091)

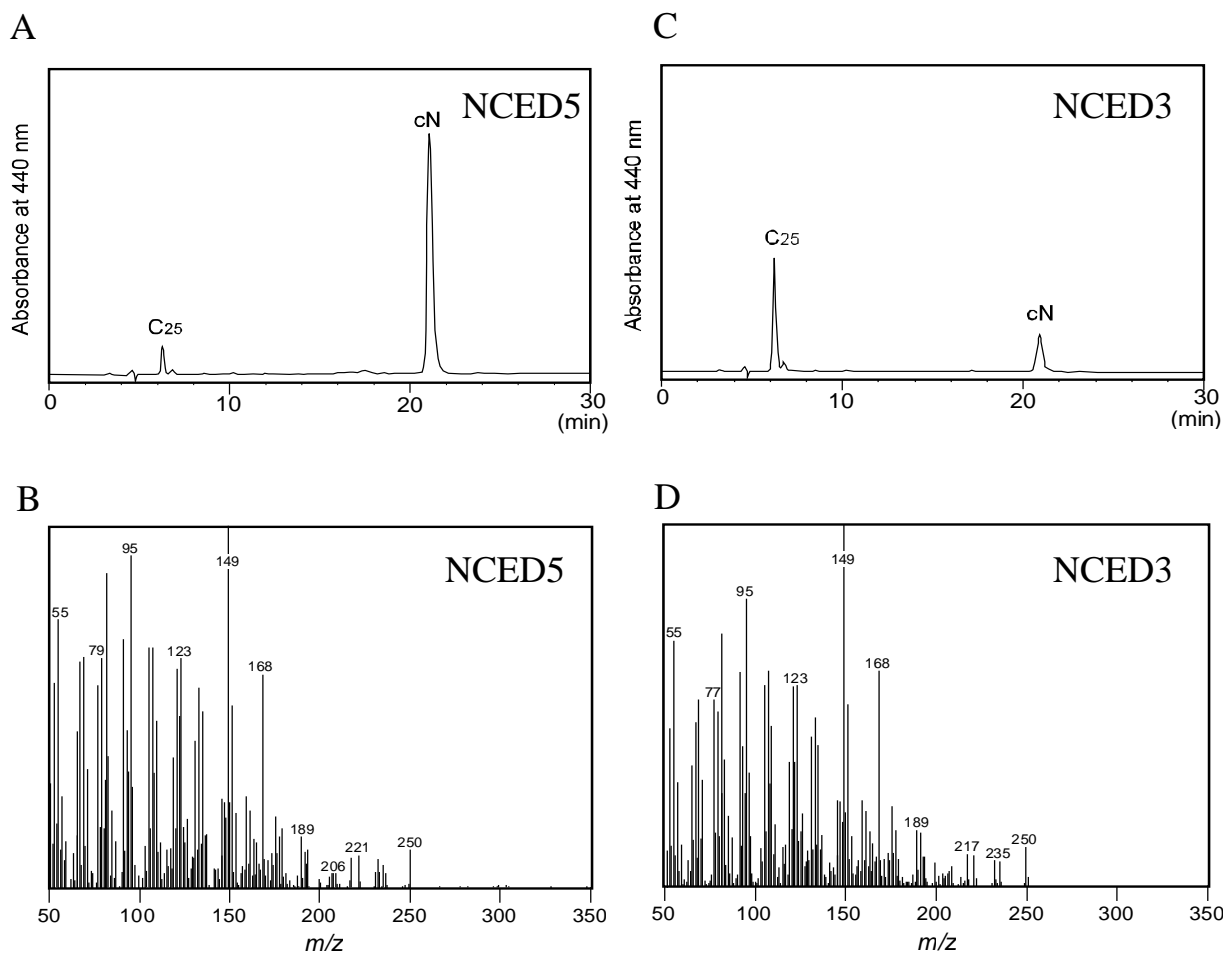

Supplemental Figure S1. Toh et al.

Supplement: plntphys_pp.107.113738_1.pdf [file plntphys_pp.107.113738_1.pdf]

A

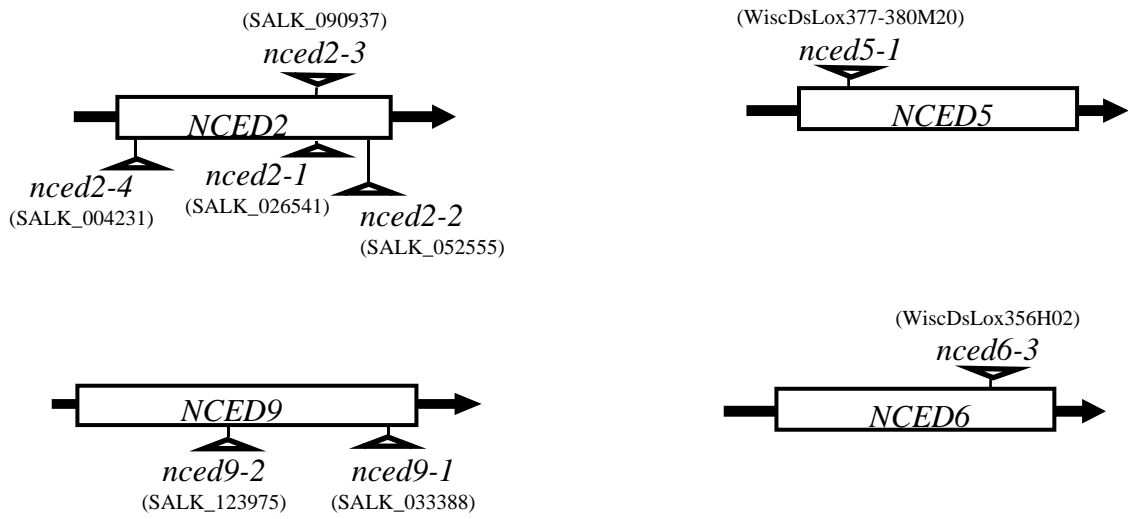

B

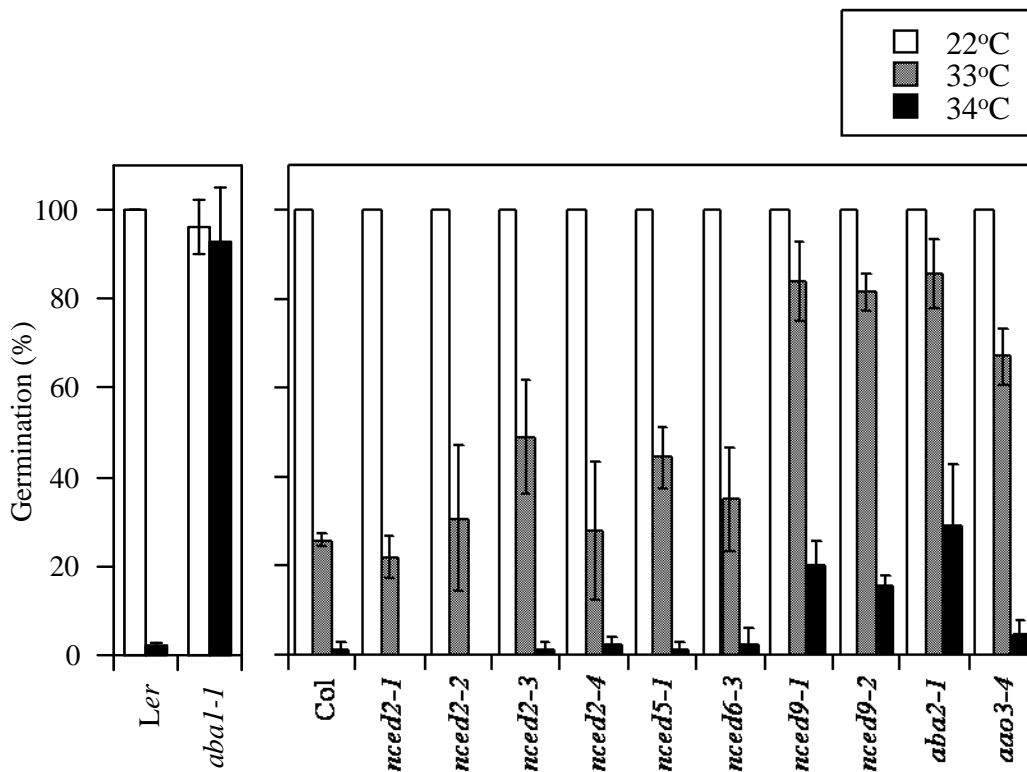

Supplemental Figure S2. Toh et al.

Supplement: plntphys_pp.107.113738_2.pdf [file plntphys_pp.107.113738_2.pdf]
